# Supplementary material for: Er3+-Ions-Doped Multiscale Nanoprobes for Fluorescence Imaging in Cellular and Living Mice
Source: MDPI journal article supplement (doi:10.3390/nano11102676), 2021-10-12
Supplement: s1 [file s1]

## **Supplementary Materials**

### **Er<sup>3+</sup> ions doped multiscale nanoprobe for fluorescence imaging in cellular and living mice**

Cong Cao\*, Yu Xie, Shiwen Li, Chang Hong

Institute of Smart Biomedical Materials, School of Materials Science and Engineering, Zhejiang

Sci-Tech University, Hangzhou, 310018, China

\*Corresponding author: ccong@zstu.edu.cn (C. Cao)

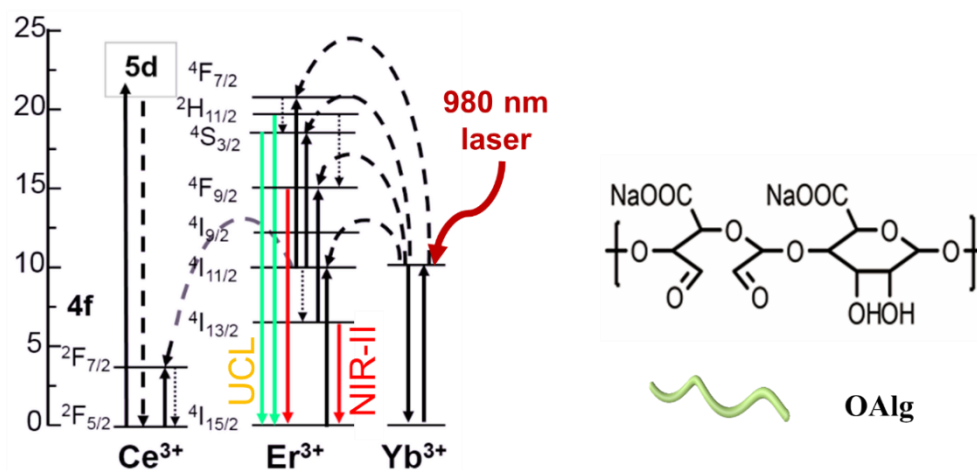

**Figure S1.** The energy transform of the  $\text{NaYF}_4:\text{Yb},\text{Er},\text{Ce-OA}$  and the structure of OAlg molecule.

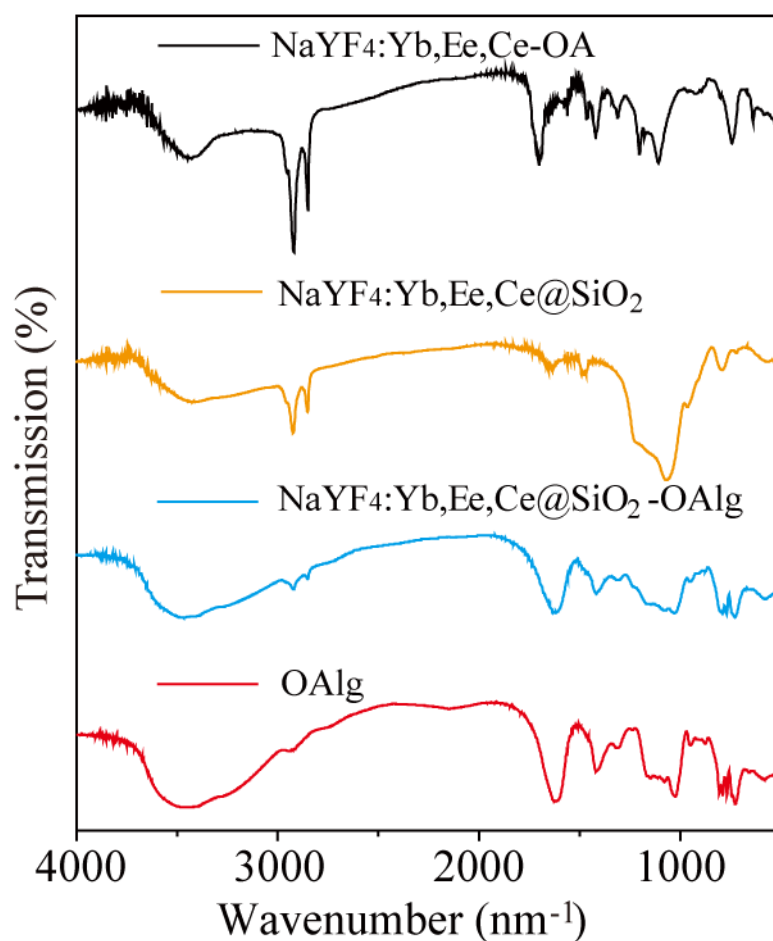

**Figure S2.** FTIR measurement of  $\text{NaYF}_4:20\%\text{Yb},2\%\text{Er},3\%\text{Ce}$  nanoparticles capped with OA ( $\text{NaYF}_4:\text{Yb},\text{Er},\text{Ce-OA}$ ),  $\text{NaYF}_4:\text{Yb},\text{Er},\text{Ce}@SiO_2$  nanoparticles,  $\text{NaYF}_4:\text{Yb},\text{Er},\text{Ce}@SiO_2\text{-OAlg}$  nanoparticles and the OAlg molecule.

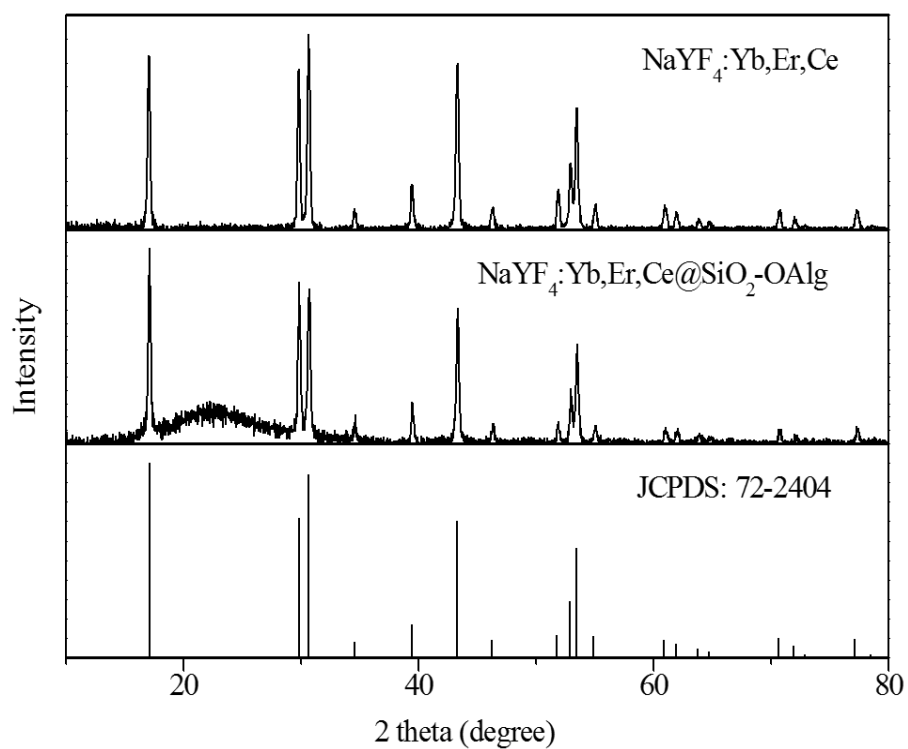

**Figure S3.** XRD measurement of  $\text{NaYF}_4:\text{Yb,Er,Ce}$  nanoparticles and  $\text{NaYF}_4:\text{Yb,Er,Ce}@ \text{SiO}_2\text{-OAlg}$  nanoparticles.

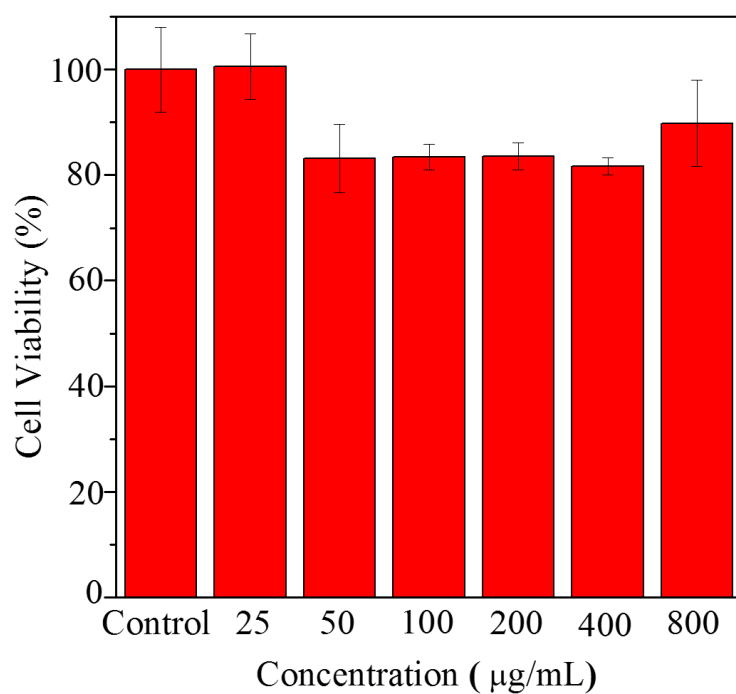

**Figure S4.** The cell toxicity of  $\text{NaYF}_4:\text{Yb,Er,Ce}@ \text{SiO}_2\text{-OAlg}$  nanoparticles.

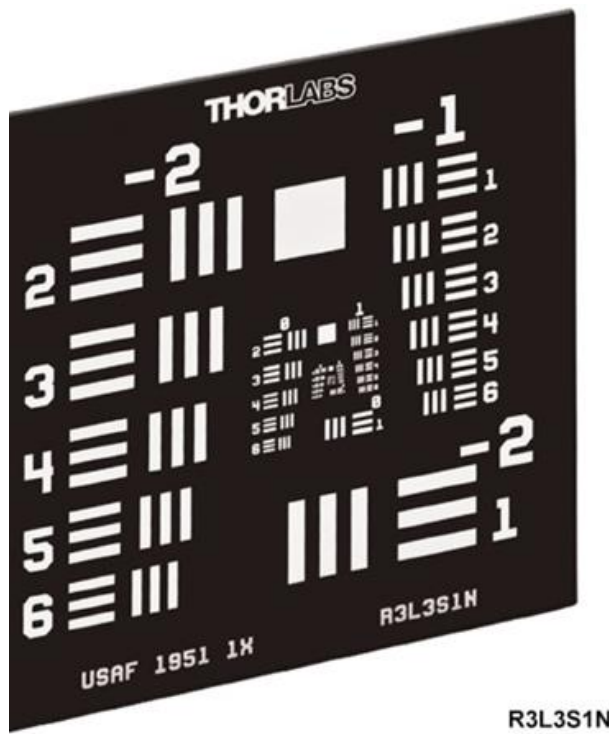

**Figure S5.** The photo of R3L3S1N card from Thorlabs Co.

| Group | Element | Frequency | Line Width<br>(um) | Group | Element | Frequency | Line Width<br>(um) | Group | Element | Frequency | Line Width<br>(um) | Group | Element | Frequency | Line Width<br>(um) |
|-------|---------|-----------|--------------------|-------|---------|-----------|--------------------|-------|---------|-----------|--------------------|-------|---------|-----------|--------------------|
| -2    | 1       | 0.2500    | 2000               | 4     | 1       | 16.00     | 31.3               | 1     | 1       | 2.000     | 250                | 7     | 1       | 128.0     | 3.91               |
|       | 2       | 0.2806    | 1782               |       | 2       | 17.96     | 27.8               |       | 2       | 2.245     | 223                |       | 2       | 143.7     | 3.48               |
|       | 3       | 0.3150    | 1587               |       | 3       | 20.16     | 24.8               |       | 3       | 2.520     | 198                |       | 3       | 161.3     | 3.10               |
|       | 4       | 0.3536    | 1414               |       | 4       | 22.63     | 22.1               |       | 4       | 2.828     | 177                |       | 4       | 181.0     | 2.76               |
|       | 5       | 0.3969    | 1260               |       | 5       | 25.40     | 19.7               |       | 5       | 3.174     | 157                |       | 5       | 203.2     | 2.46               |
|       | 6       | 0.4454    | 1122               |       | 6       | 28.51     | 17.5               |       | 6       | 3.564     | 140                |       | 6       | 228.1     | 2.19               |
| -1    | 1       | 0.5000    | 100                | 5     | 1       | 32.00     | 15.6               | 2     | 1       | 4.00      | 125                | 8     | 1       | 256.0     | 1.95               |
|       | 2       | 0.5612    | 891                |       | 2       | 35.92     | 13.9               |       | 2       | 4.490     | 111                |       | 2       | 287.4     | 1.74               |
|       | 3       | 0.6300    | 794                |       | 3       | 40.32     | 12.4               |       | 3       | 5.040     | 99.2               |       | 3       | 322.5     | 1.55               |
|       | 4       | 0.7071    | 707                |       | 4       | 45.25     | 11.0               |       | 4       | 5.657     | 88.4               |       | 4       | 362.0     | 1.38               |
|       | 5       | 0.7937    | 630                |       | 5       | 50.80     | 9.84               |       | 5       | 6.350     | 78.7               |       | 5       | 406.4     | 1.23               |
|       | 6       | 0.8909    | 561                |       | 6       | 57.02     | 8.77               |       | 6       | 7.127     | 70.2               |       | 6       | 456.1     | 1.10               |
| 0     | 1       | 1.00      | 500                | 6     | 1       | 64.00     | 7.81               | 3     | 1       | 8.000     | 62.5               | 9     | 1       | 512.0     | 0.977              |
|       | 2       | 1.122     | 445                |       | 2       | 71.84     | 6.96               |       | 2       | 8.980     | 55.7               |       | 2       | 574.7     | 0.870              |
|       | 3       | 1.260     | 397                |       | 3       | 80.63     | 6.20               |       | 3       | 10.08     | 49.6               |       | 3       | 645.1     | 0.775              |
|       | 4       | 1.414     | 354                |       | 4       | 90.51     | 5.52               |       | 4       | 11.31     | 44.2               |       | 4       | 724.1     | 0.691              |
|       | 5       | 1.587     | 315                |       | 5       | 101.6     | 4.92               |       | 5       | 12.70     | 39.4               |       | 5       | 812.7     | 0.615              |
|       | 6       | 1.782     | 281                |       | 6       | 114.0     | 4.38               |       | 6       | 14.25     | 35.1               |       | 6       | 912.3     | 0.548              |

**Figure S6.** 1951 USAF Resolution Target Data from Thorlabs Co.
